# Supplementary material for: Effect of linagliptin plus insulin in comparison to insulin alone on metabolic control and prognosis in hospitalized patients with SARS-CoV-2 infection
Source: PubMed Central journal article supplement (PMC8752656; doi:10.1038/s41598-021-04511-1), 2022-01-11
Supplement: 41598_2021_4511_MOESM1_ESM.pdf [file 41598_2021_4511_MOESM1_ESM.pdf]

**Effect of Linagliptin Plus Insulin in Comparison to Insulin Alone on Metabolic Control and Prognosis in Hospitalized Patients with SARS-CoV-2 Infection**

Rodolfo Guardado-Mendoza MD PhD, Miguel Angel Garcia Magaña MD, Liz Jovanna Martínez Navarro MD, Hilda Elizabeth Macías Cervantes MD, Rodolfo Aguilar-Guerrero MD, Erick L. Suárez-Pérez, Alberto Aguilar-García MD

Short running title: linagliptin for SARS-Cov-2 infection

Rodolfo Guardado-Mendoza MD PhD, Research Department Hospital Regional de Alta Especialidad del Bajío, and University of Guanajuato, León, Guanajuato, México, [guardamen@gmail.com](mailto:guardamen@gmail.com)

Miguel Angel Garcia Magaña MD, Internal Medicine Department, Hospital Regional de Alta Especialidad del Bajío, León, Guanajuato, México, [miganggar7@gmail.com](mailto:miganggar7@gmail.com)

Liz Jovanna Martínez Navarro MD, Internal Medicine Department, Hospital Regional de Alta Especialidad del Bajío, León, Guanajuato, México, [falcot23@hotmail.com](mailto:falcot23@hotmail.com)

Hilda Elizabeth Macías Cervantes MD, Internal Medicine Department, Unidad Médica de Alta Especialidad T1, Instituto Mexicano del Seguro Social, León, Guanajuato, México [liz\\_2787@hotmail.com](mailto:liz_2787@hotmail.com)

Rodolfo Aguilar-Guerrero MD, Internal Medicine Department, Unidad Médica de Alta Especialidad T1, Instituto Mexicano del Seguro Social, León, Guanajuato, México, [rodolfo\\_merhaba@hotmail.com](mailto:rodolfo_merhaba@hotmail.com)

Erick L. Suárez-Pérez, Department of Biostatistics and Epidemiology, Graduated School of Public Health, University of Puerto Rico, [erick.suarez@upr.edu](mailto:erick.suarez@upr.edu)

Alberto Aguilar-García MD, Endocrinology Department Hospital Regional de Alta Especialidad del Bajío, León, Guanajuato, México, [betaag@yahoo.com.mx](mailto:betaag@yahoo.com.mx)

**Corresponding autor:** Rodolfo Guardado-Mendoza MD PhD, [guardamen@gmail.com](mailto:guardamen@gmail.com), Blvd.Milenio

#130, Col. San Carlos la Roncha, León Guanajuato. CP. 37660, Tel.+52 (477) 267 2000.

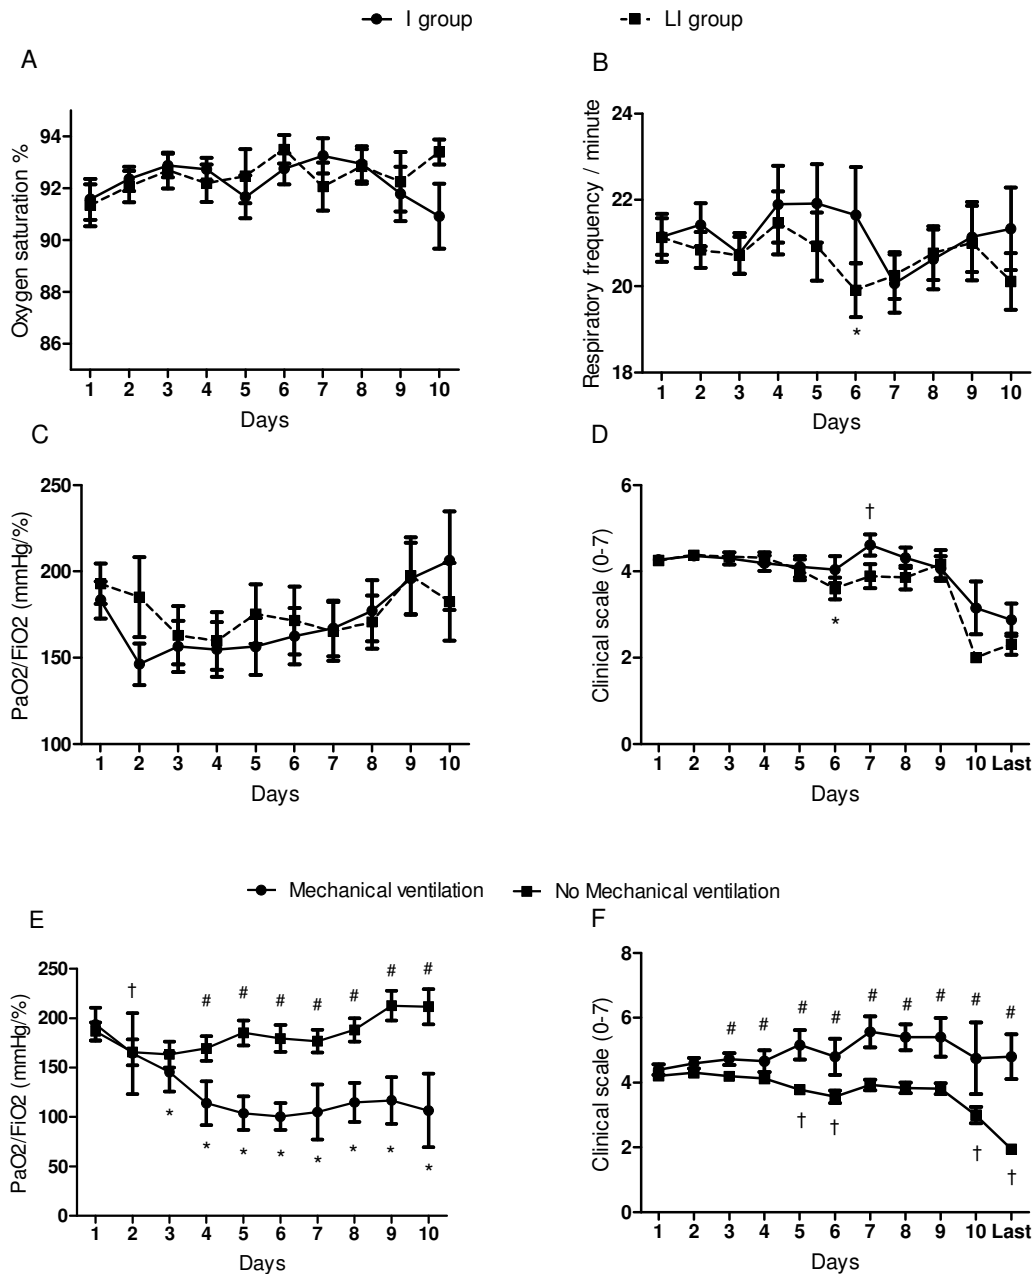

Supplemental Figure 1. Oxygen saturation (A), respiratory frequency (B), PaO<sub>2</sub>/FiO<sub>2</sub> (C), and Clinical scale evolution (D) between the study groups during the first 10 days of hospitalization.

\*p<0.05 vs day 1 in *LI group*; †p<0.05 vs day 1 in *I group*. PaO<sub>2</sub>/FiO<sub>2</sub> (E) and Clinical scale evolution (F) between patients *with* or *without mechanical ventilation*. \*p<0.05 vs day 1 in patients *with mechanical ventilation*; †p<0.05 vs day 1 in patients *without mechanical ventilation*; # p<0.05 for comparison between patients *with* and *without mechanical ventilation* at different time points.
